# Supplementary material for: Antimicrobial properties of half-sandwich Ir(iii) cyclopentadienyl complexes with pyridylbenzimidazole ligands
Source: Royal Society of Chemistry journal article supplement (doi:10.1039/d0dt00451k), 2020-01-01
Supplement: d0dt00451k1.pdf [file d0dt00451k1.pdf]

## Supporting Information

|                  |                                                                                                                                                                                                                                                                                                                                                                                         |
|------------------|-----------------------------------------------------------------------------------------------------------------------------------------------------------------------------------------------------------------------------------------------------------------------------------------------------------------------------------------------------------------------------------------|
| <b>Figure S1</b> | AT IR spectra of half-sandwich Ir(III) compounds a) <b>1</b> , b) <b>2</b> and c) <b>3</b> .                                                                                                                                                                                                                                                                                            |
| <b>Figure S2</b> | NMR analysis of $[\{\eta^5\text{-C}_5\text{Me}_5\}\text{IrCl}]_2(\mu\text{-Cl})_2$ in $\text{CDCl}_3$ , a) $^1\text{H}$ and b) $^{13}\text{C}$ .                                                                                                                                                                                                                                        |
| <b>Figure S3</b> | NMR analysis of <b>1</b> in $[\text{D}_6]$ DMSO, a) $^1\text{H}$ , b) $^{13}\text{C}$ , c) $\{^1\text{H}, ^1\text{H}\}$ COS90 and d) $\{^{13}\text{C}, ^1\text{H}\}$ HSQC.                                                                                                                                                                                                              |
| <b>Figure S4</b> | NMR analysis of <b>2</b> in $[\text{D}_6]$ DMSO, a) $^{13}\text{C}$ , and b) $\{^{13}\text{C}, ^1\text{H}\}$ HSQC.                                                                                                                                                                                                                                                                      |
| <b>Figure S5</b> | NMR analysis of <b>3</b> in $\text{CD}_3\text{CN}$ , a) $^1\text{H}$ , b) $^{13}\text{C}$ , and c) $\{^{13}\text{C}, ^1\text{H}\}$ HSQC.                                                                                                                                                                                                                                                |
| <b>Table S1</b>  | Atomic coordinates of the optimized structure of <b>1</b> .                                                                                                                                                                                                                                                                                                                             |
| <b>Table S2</b>  | Atomic coordinates of the optimized structure of <b>2</b> .                                                                                                                                                                                                                                                                                                                             |
| <b>Table S3</b>  | Atomic coordinates of the optimized structure of <b>3</b> .                                                                                                                                                                                                                                                                                                                             |
| <b>Figure S6</b> | Absorption spectra of complex a) <b>1</b> and b) <b>2</b> in Tris-buffer (in 20% (v/v) DMSO/tris-buffer (NaCl 50 mM, Tris-HCl 5 mM, pH = 7.4)), in absence ( $R = 0.0$ ) and presence ( $R > 0.0$ ) of increasing amounts of calf-thymus DNA ( $R = [\text{DNA}]/[\text{complex}]$ , $[\text{complex}] = 3.22 \times 10^{-5}$ M ( <b>1</b> ) and $2.80 \times 10^{-5}$ M ( <b>2</b> )). |
| <b>Table S4</b>  | Computed excitation energies (eV), electronic transition configurations and oscillator strengths ( $f$ ) of the studied complexes (selected).                                                                                                                                                                                                                                           |
| <b>Figure S7</b> | Selected Frontiers molecular orbitals of <b>2</b> calculated at B3LYP/LANL2DZ level of theory.                                                                                                                                                                                                                                                                                          |
| <b>Figure S8</b> | Stability of a) <b>1</b> and b) <b>2</b> (aromatic region) in $[\text{D}_6]$ DMSO followed by $^1\text{H}$ NMR at different time interval [a (10 min), b (1 h), c (6 h) and d (24 h)].                                                                                                                                                                                                  |
| <b>Figure S9</b> | $^{13}\text{C}$ NMR spectra of complex <b>1</b> ( $[\text{D}_6]$ DMSO) in presence and absence of imidazole.                                                                                                                                                                                                                                                                            |
|                  | Biological studies                                                                                                                                                                                                                                                                                                                                                                      |

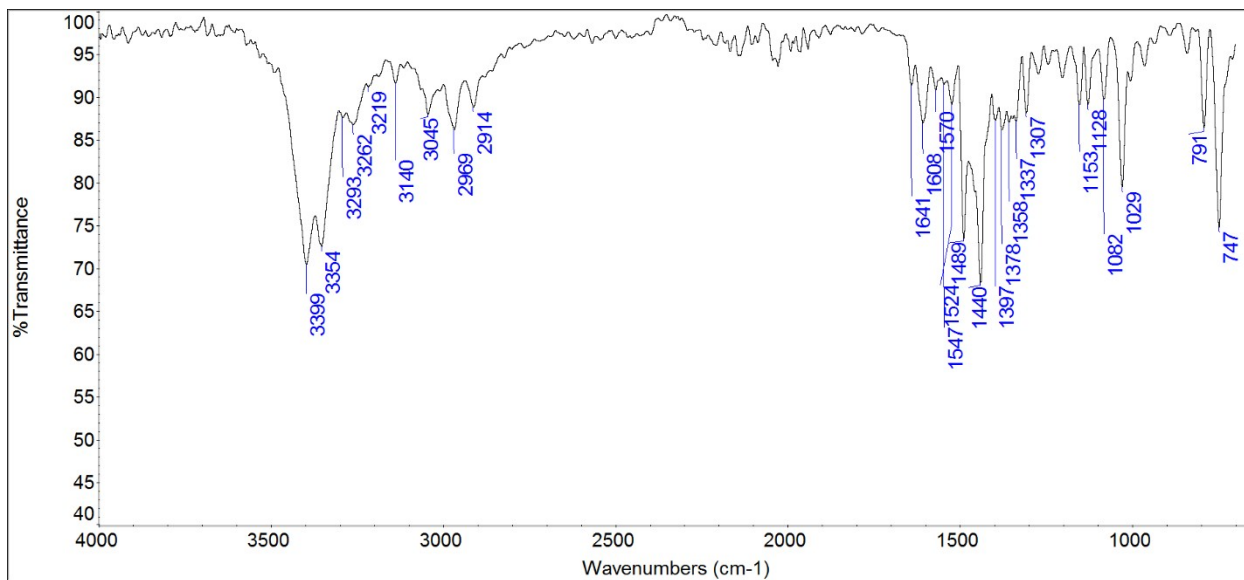

a)

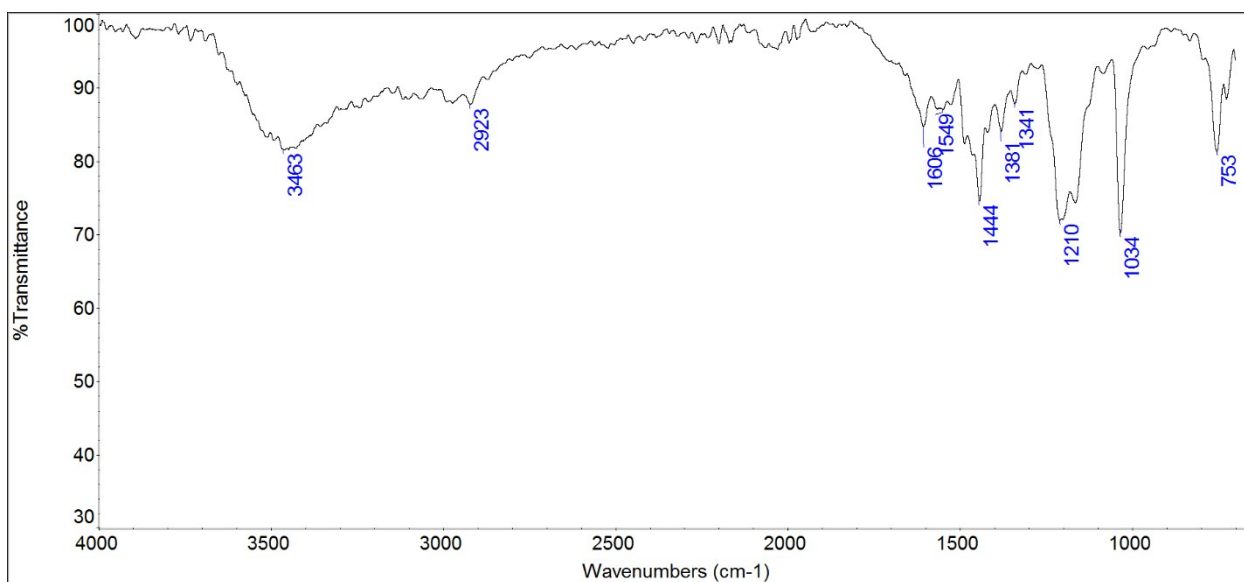

b)

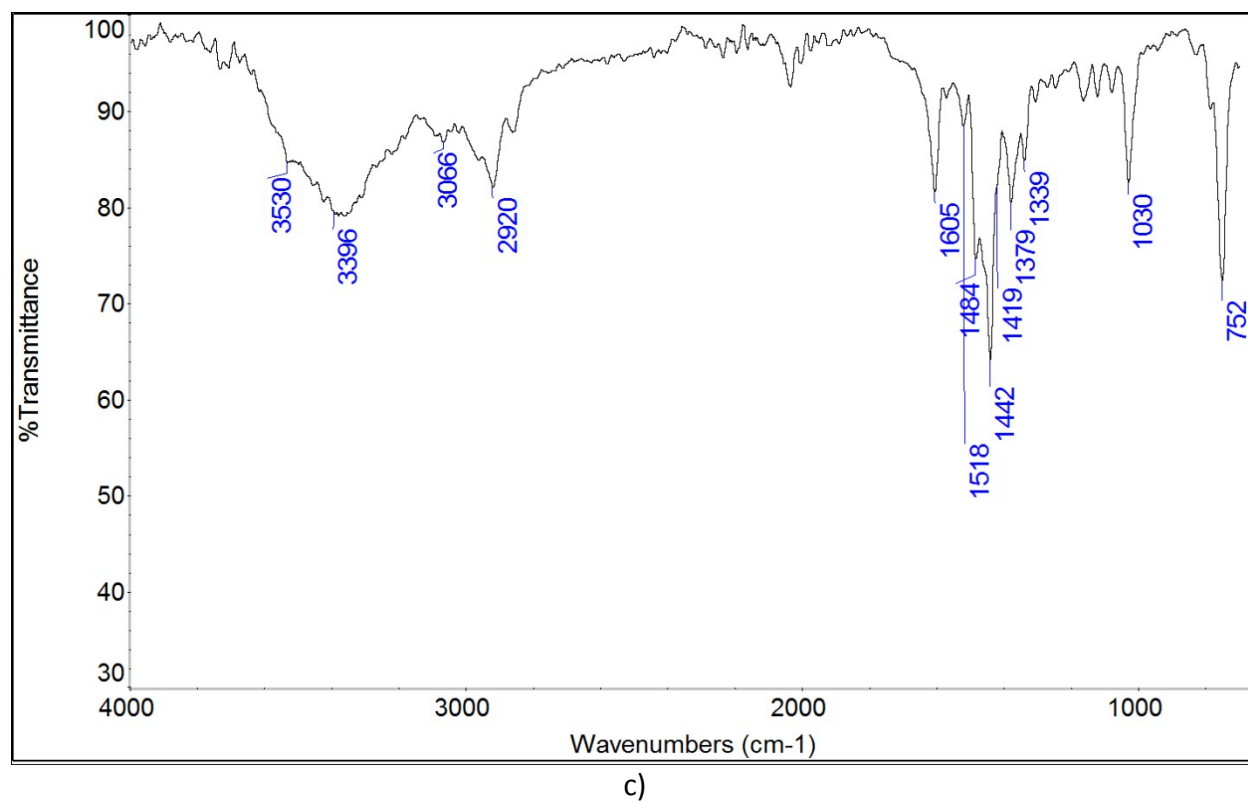

Figure S1 AT IR spectra of half-sandwich Ir(III) compounds a) **1**, b) **2** and c) **3**.

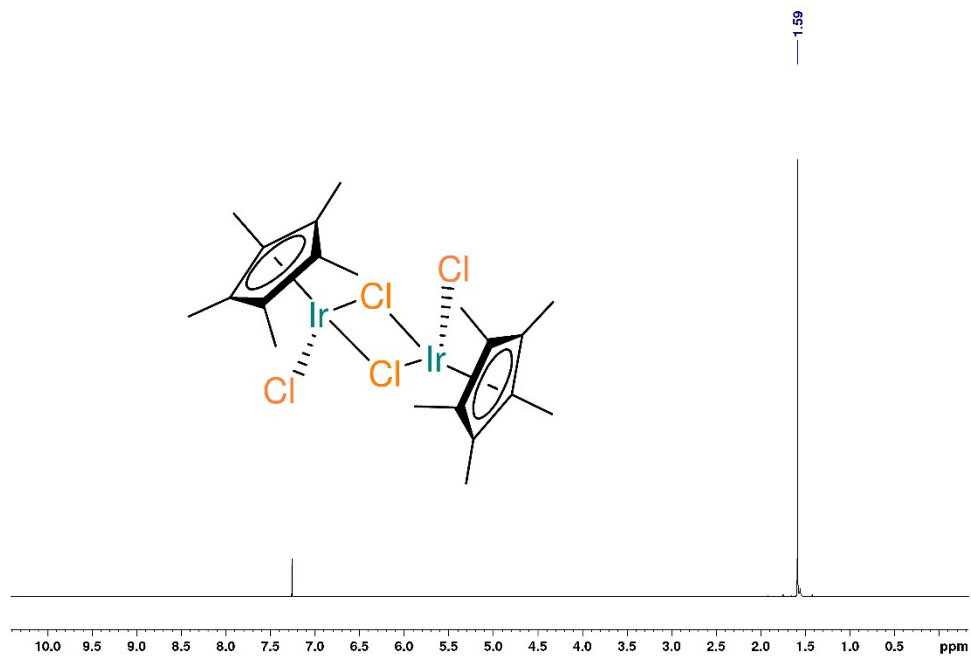

a)

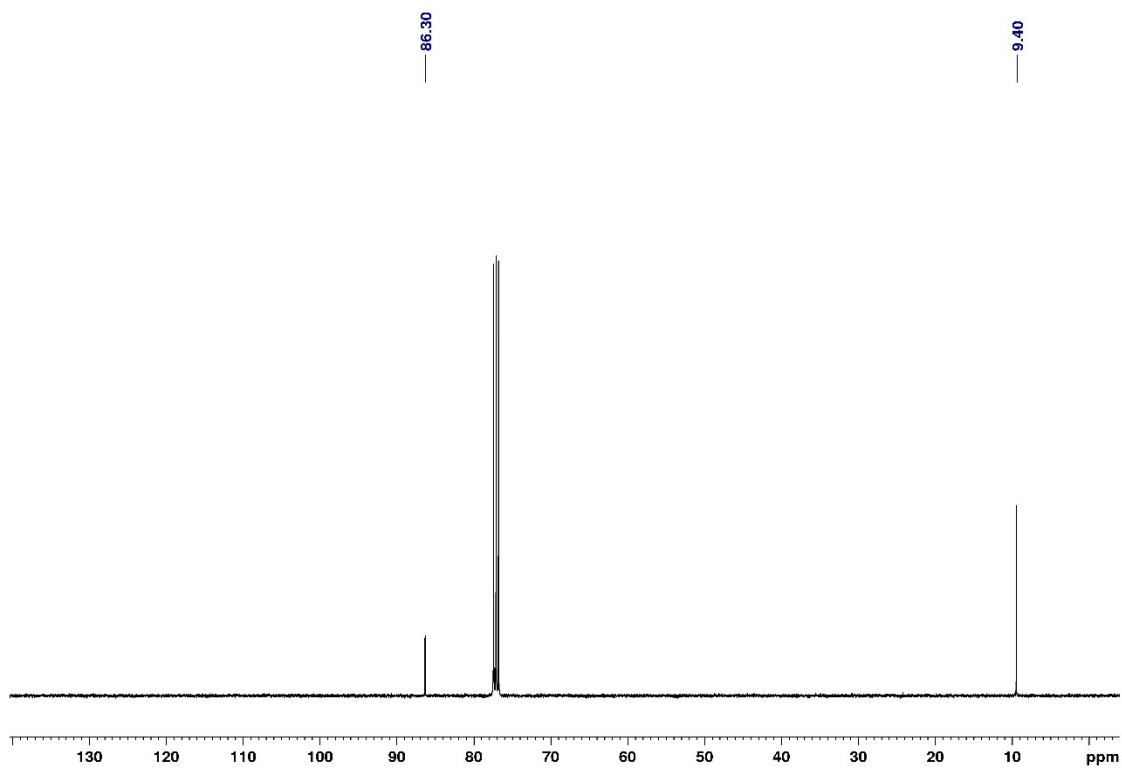

b)

Figure S2 NMR analysis of  $[\{\eta^5\text{-C}_5\text{Me}_5\}\text{IrCl}_2(\mu\text{-Cl})_2]$  in  $\text{CDCl}_3$ , a)  $^1\text{H}$  and b)  $^{13}\text{C}$ .

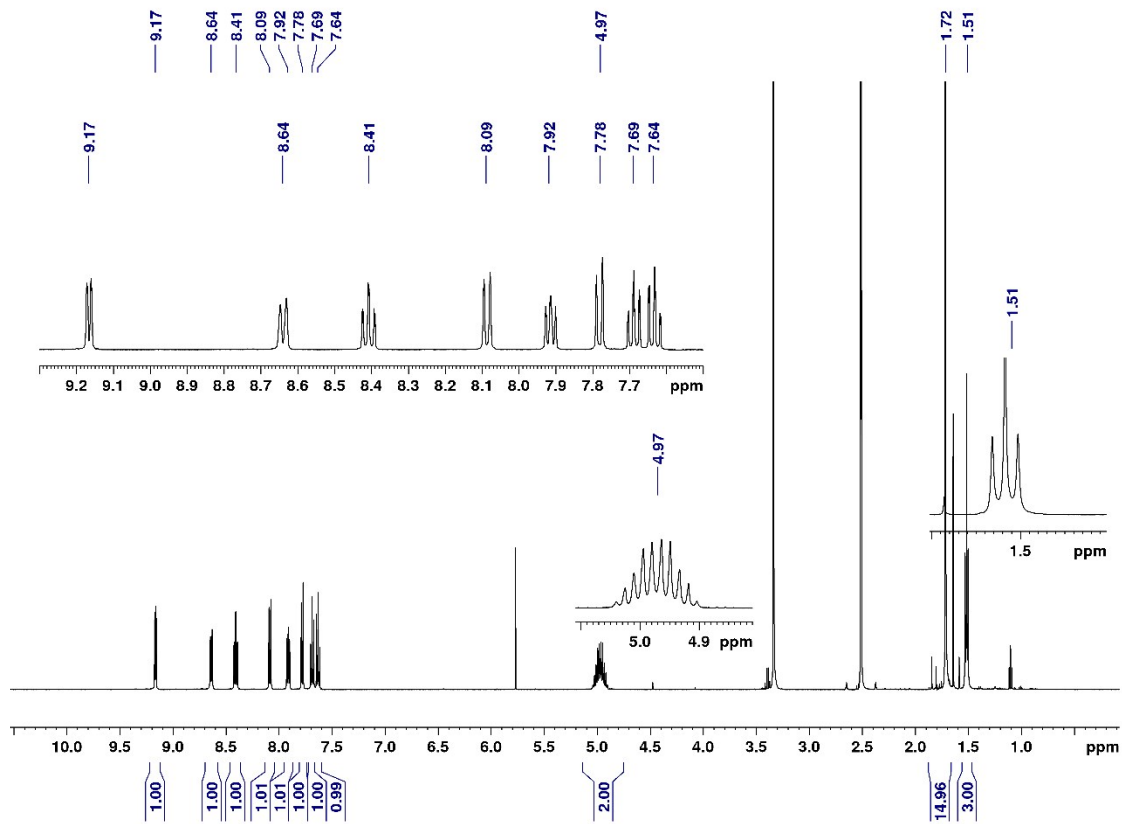

a)

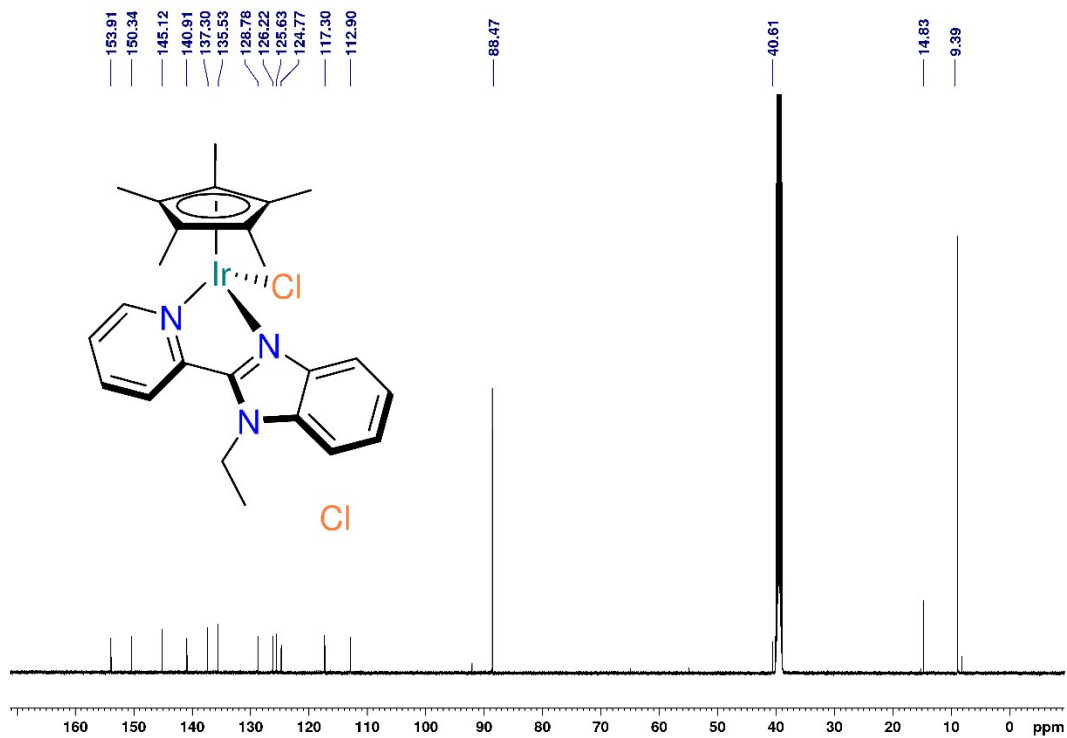

b)

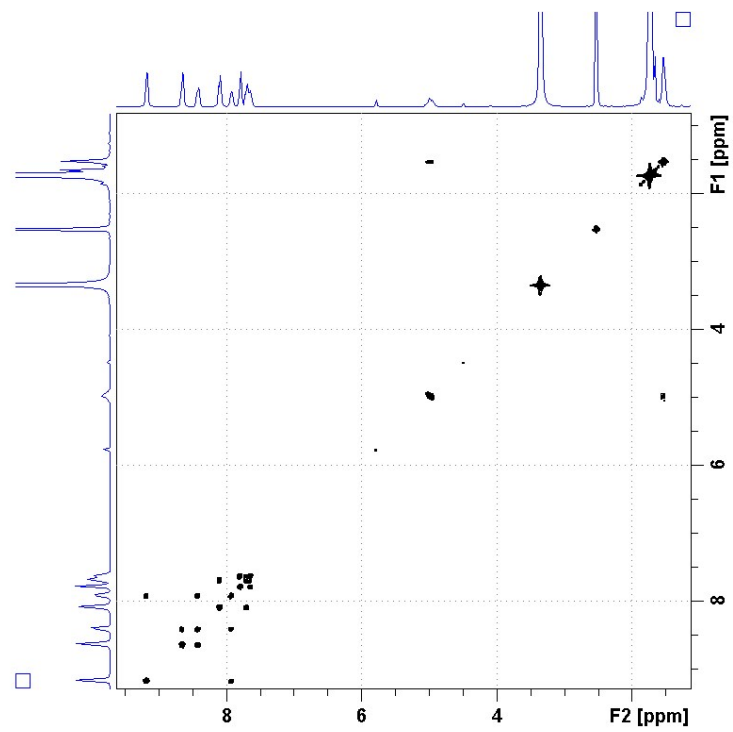

c)

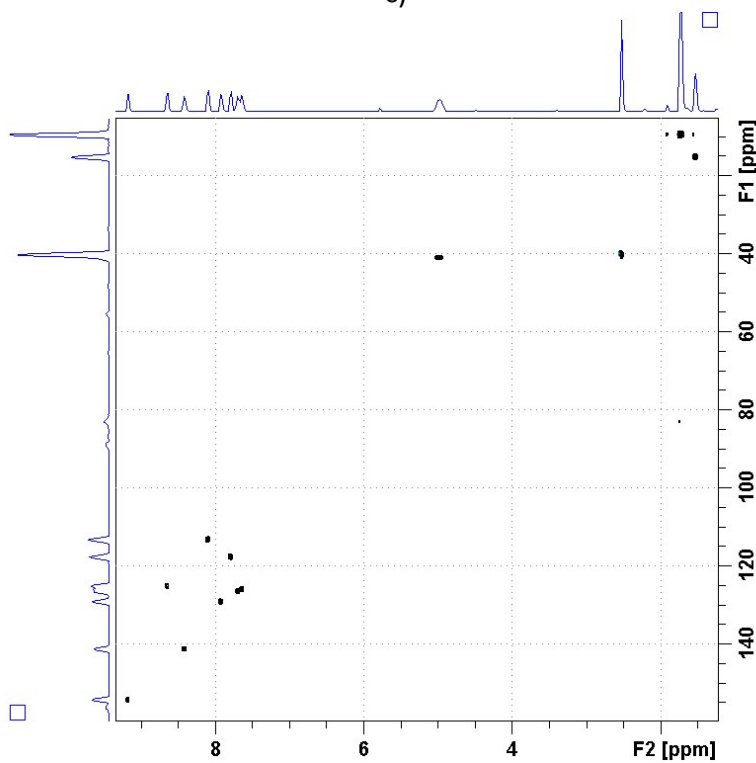

d)

Figure S3 NMR analysis of **1** in  $[D_6]$  DMSO, a)  $^1H$ , b)  $^{13}C$ , c)  $\{^1H, ^1H\}$  COSY and d)  $\{^{13}C, ^1H\}$  HSQC.

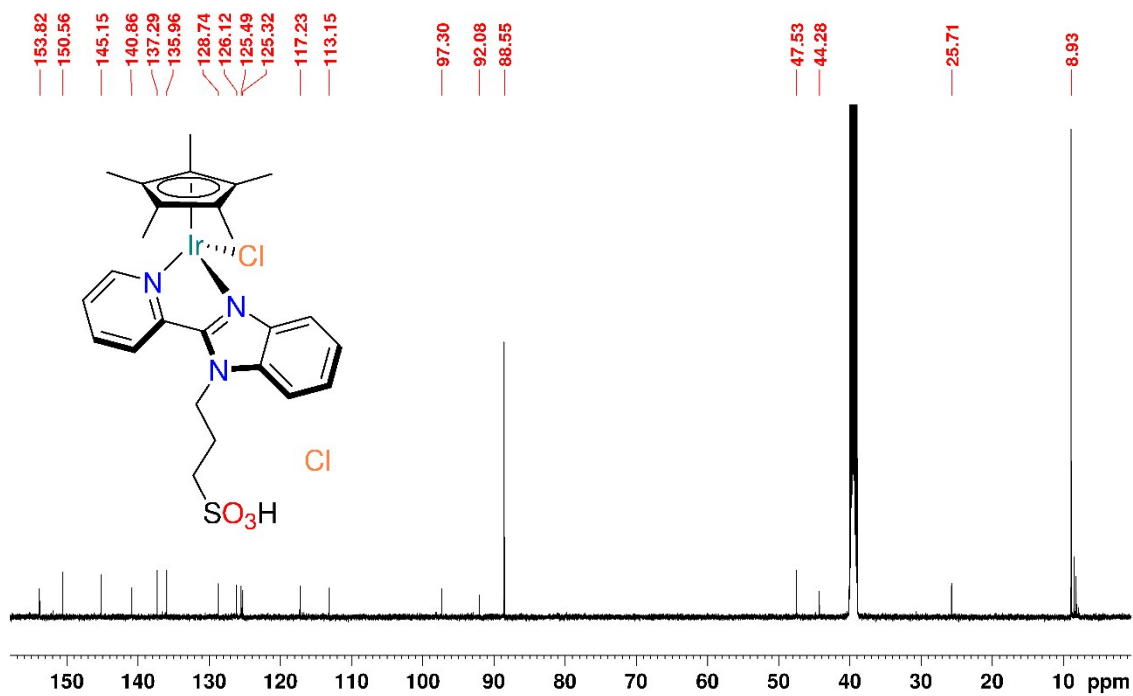

a)

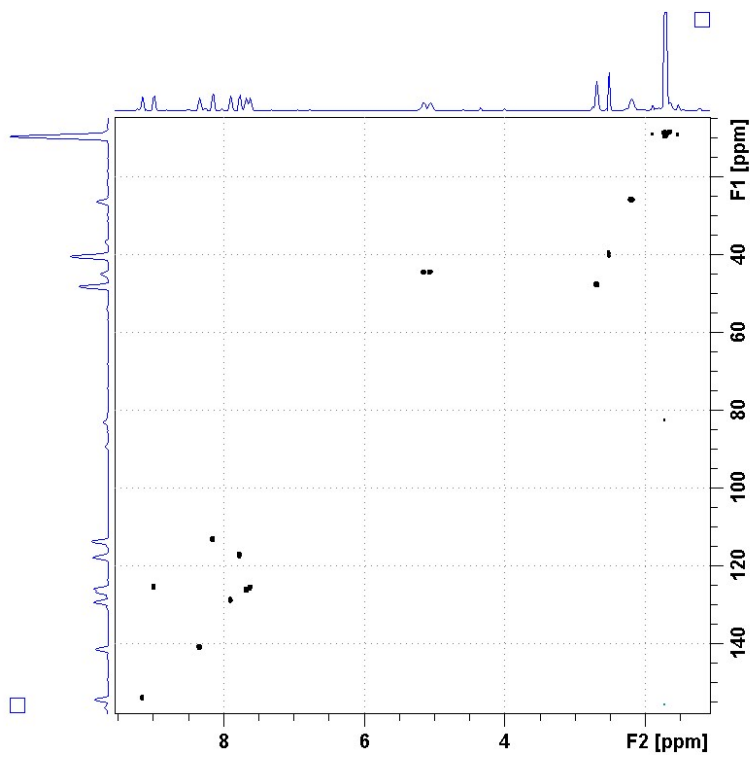

b)

Figure S4 NMR analysis of **2** in  $[\text{D}_6]$  DMSO, a)  $^{13}\text{C}$ , and b)  $\{^{13}\text{C}, ^1\text{H}\}$  HSQC.

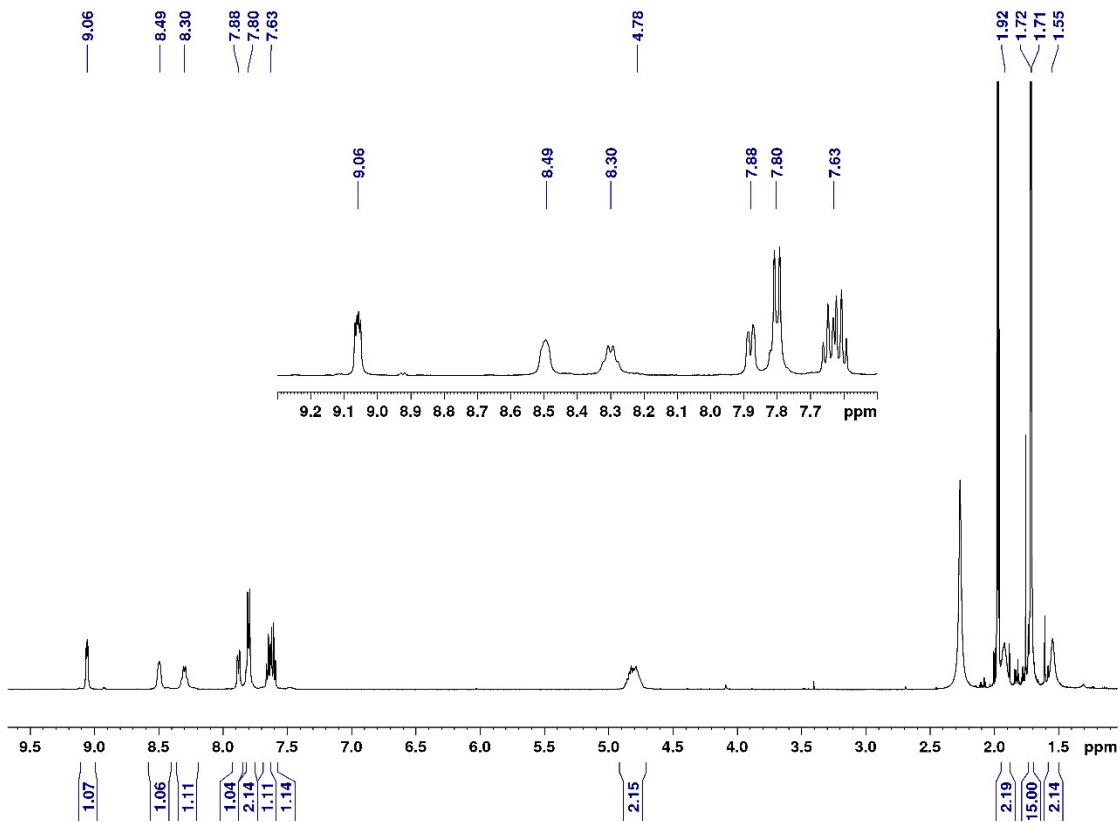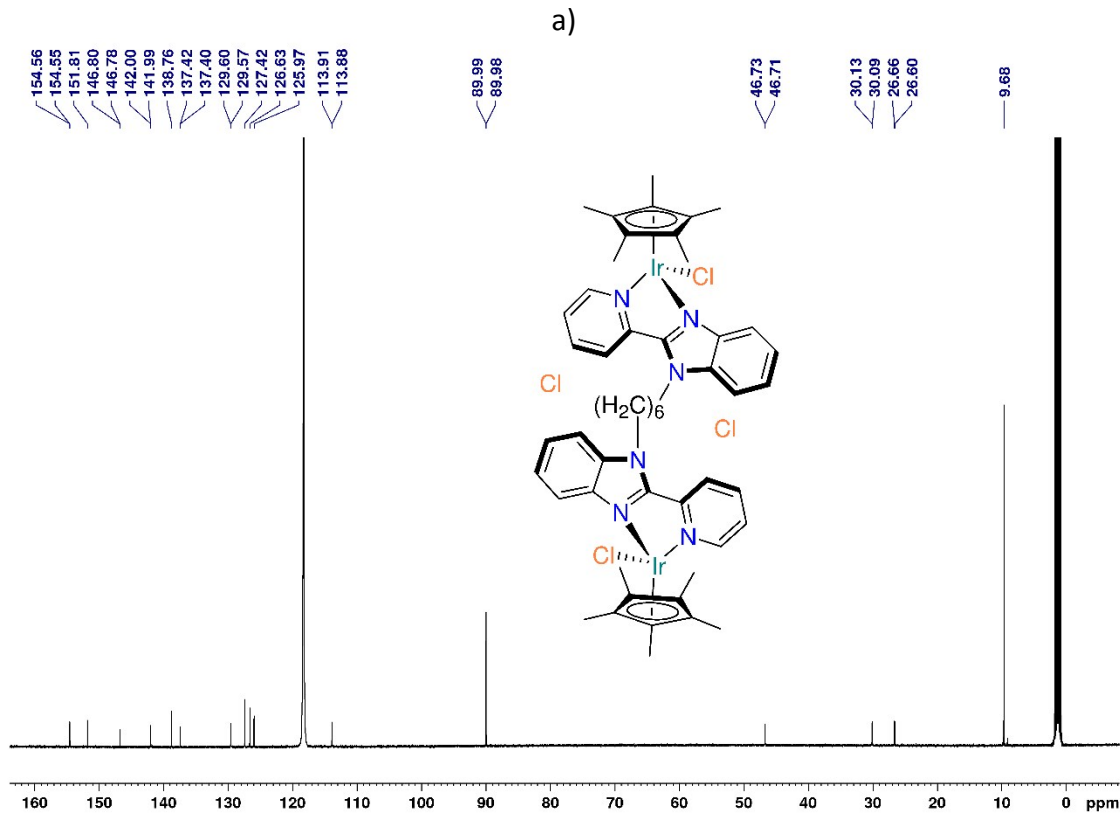



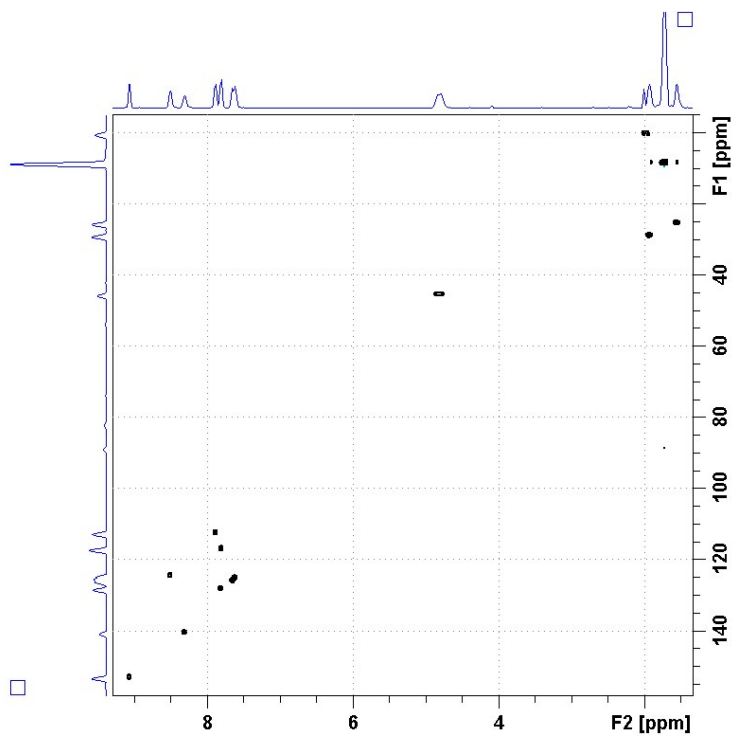

c)  
Figure S5 NMR analysis of **3** in CD<sub>3</sub>CN, a) <sup>1</sup>H, b) <sup>13</sup>C, and c) {<sup>13</sup>C, <sup>1</sup>H} HSQC.

| <b>Table S1</b> Atomic coordinates of the optimized structure of <b>1</b> . |               |             |                         |           |           |
|-----------------------------------------------------------------------------|---------------|-------------|-------------------------|-----------|-----------|
| Center Number                                                               | Atomic Number | Atomic Type | Coordinates (Angstroms) |           |           |
|                                                                             |               |             | X                       | Y         | Z         |
| 1                                                                           | 17            | 0           | 0.615087                | -0.087319 | -2.545769 |
| 2                                                                           | 6             | 0           | 2.964318                | 0.296407  | 0.734634  |
| 3                                                                           | 6             | 0           | -1.98671                | -1.442099 | -0.119132 |
| 4                                                                           | 6             | 0           | 2.05691                 | -0.161041 | 1.782839  |
| 5                                                                           | 6             | 0           | 3.056907                | -0.724586 | -0.258571 |
| 6                                                                           | 6             | 0           | 2.200854                | -1.833735 | 0.149034  |
| 7                                                                           | 6             | 0           | 1.636333                | -1.494402 | 1.436505  |
| 8                                                                           | 6             | 0           | 1.793135                | 0.541291  | 3.082281  |
| 9                                                                           | 1             | 0           | 1.747091                | 1.626724  | 2.955219  |
| 10                                                                          | 1             | 0           | 2.594655                | 0.327371  | 3.801724  |
| 11                                                                          | 1             | 0           | 0.851098                | 0.215388  | 3.53094   |
| 12                                                                          | 6             | 0           | 3.770258                | 1.55953   | 0.784073  |
| 13                                                                          | 1             | 0           | 4.705195                | 1.373959  | 1.328581  |
| 14                                                                          | 1             | 0           | 3.24569                 | 2.361661  | 1.310505  |
| 15                                                                          | 1             | 0           | 4.041842                | 1.913908  | -0.214029 |
| 16                                                                          | 6             | 0           | 3.912232                | -0.720027 | -1.487119 |
| 17                                                                          | 1             | 0           | 4.295738                | 0.277121  | -1.714138 |
| 18                                                                          | 1             | 0           | 3.350186                | -1.068506 | -2.357203 |
| 19                                                                          | 1             | 0           | 4.771359                | -1.386987 | -1.338204 |
| 20                                                                          | 6             | 0           | 2.149823                | -3.155727 | -0.559365 |
| 21                                                                          | 1             | 0           | 3.114233                | -3.671056 | -0.464606 |
| 22                                                                          | 1             | 0           | 1.939474                | -3.026191 | -1.624837 |
| 23                                                                          | 1             | 0           | 1.388621                | -3.816264 | -0.137275 |
| 24                                                                          | 6             | 0           | 0.802017                | -2.380227 | 2.310986  |
| 25                                                                          | 1             | 0           | 1.438774                | -2.823358 | 3.087632  |
| 26                                                                          | 1             | 0           | 0.342899                | -3.197302 | 1.753409  |
| 27                                                                          | 1             | 0           | 0.006491                | -1.822524 | 2.812277  |
| 28                                                                          | 7             | 0           | 0.097144                | 1.912554  | -0.230712 |
| 29                                                                          | 6             | 0           | -1.254903               | 2.03971   | -0.092306 |
| 30                                                                          | 6             | 0           | -1.853789               | 3.304064  | -0.071811 |
| 31                                                                          | 1             | 0           | -2.917263               | 3.410188  | 0.085537  |
| 32                                                                          | 6             | 0           | -1.068827               | 4.439692  | -0.251908 |
| 33                                                                          | 1             | 0           | -1.526467               | 5.423669  | -0.239775 |
| 34                                                                          | 6             | 0           | 0.299928                | 4.290728  | -0.46167  |
| 35                                                                          | 1             | 0           | 0.945866                | 5.14425   | -0.634797 |
| 36                                                                          | 6             | 0           | 0.840612                | 3.009218  | -0.442061 |
| 37                                                                          | 1             | 0           | 1.896734                | 2.841662  | -0.603684 |
| 38                                                                          | 7             | 0           | -1.14924                | -0.346336 | -0.053438 |
| 39                                                                          | 6             | 0           | -1.92079                | 0.745327  | -0.025435 |
| 40                                                                          | 7             | 0           | -3.250073               | 0.415586  | -0.036971 |
| 41                                                                          | 6             | 0           | -3.317618               | -0.972232 | -0.081829 |
| 42                                                                          | 6             | 0           | -4.411591               | -1.845238 | -0.117443 |

|                            |    |   |                |           |           |
|----------------------------|----|---|----------------|-----------|-----------|
| 43                         | 1  | 0 | -5.436129      | -1.491713 | -0.073141 |
| 44                         | 6  | 0 | -4.128786      | -3.20065  | -0.220327 |
| 45                         | 1  | 0 | -4.948659      | -3.911024 | -0.255374 |
| 46                         | 6  | 0 | -2.800822      | -3.676363 | -0.298311 |
| 47                         | 1  | 0 | -2.628317      | -4.742306 | -0.408286 |
| 48                         | 6  | 0 | -1.718252      | -2.811306 | -0.251583 |
| 49                         | 1  | 0 | -0.701874      | -3.168918 | -0.350655 |
| 50                         | 6  | 0 | -4.434507      | 1.286859  | -0.030579 |
| 51                         | 1  | 0 | -5.238051      | 0.711289  | -0.495159 |
| 52                         | 1  | 0 | -4.245756      | 2.129485  | -0.699208 |
| 53                         | 6  | 0 | -4.841492      | 1.739343  | 1.373179  |
| 54                         | 1  | 0 | -5.746583      | 2.352484  | 1.31529   |
| 55                         | 1  | 0 | -4.057191      | 2.332887  | 1.854825  |
| 56                         | 1  | 0 | -5.053571      | 0.876826  | 2.012352  |
| 57                         | 77 | 0 | 0.922223       | -0.059586 | -0.130084 |
| Rotational constants (GHz) |    |   | 0.2040899      | 0.1439974 | 0.1070289 |
| E (a.u.)                   |    |   | -1660.48906147 |           |           |

| Center Number | Atomic Number | Atomic Type | Coordinates (Angstroms) |          |           |
|---------------|---------------|-------------|-------------------------|----------|-----------|
|               |               |             | X                       | Y        | Z         |
| 1             | 17            | 0           | -2.282501               | 0.189419 | -2.438590 |

|    |   |   |           |           |           |
|----|---|---|-----------|-----------|-----------|
| 2  | 6 | 0 | -3.61108  | -1.336083 | 1.01914   |
| 3  | 6 | 0 | 0.178277  | 2.170519  | -0.328056 |
| 4  | 6 | 0 | -2.676715 | -0.77704  | 1.993164  |
| 5  | 6 | 0 | -4.219607 | -0.25541  | 0.311888  |
| 6  | 6 | 0 | -3.663606 | 0.992026  | 0.816089  |
| 7  | 6 | 0 | -2.749821 | 0.656196  | 1.890154  |
| 8  | 6 | 0 | -1.933756 | -1.555871 | 3.038166  |
| 9  | 1 | 0 | -1.601003 | -2.527129 | 2.660983  |
| 10 | 1 | 0 | -2.581971 | -1.743978 | 3.904207  |
| 11 | 1 | 0 | -1.053586 | -1.014892 | 3.394896  |
| 12 | 6 | 0 | -3.990775 | -2.782811 | 0.910266  |
| 13 | 1 | 0 | -4.847968 | -2.985767 | 1.565315  |
| 14 | 1 | 0 | -3.181985 | -3.445779 | 1.228993  |
| 15 | 1 | 0 | -4.288592 | -3.054572 | -0.106386 |
| 16 | 6 | 0 | -5.280231 | -0.350294 | -0.7393   |
| 17 | 1 | 0 | -5.354224 | -1.357664 | -1.154203 |
| 18 | 1 | 0 | -5.0781   | 0.336435  | -1.564583 |
| 19 | 1 | 0 | -6.252729 | -0.090669 | -0.300508 |
| 20 | 6 | 0 | -4.18227  | 2.350362  | 0.44214   |
| 21 | 1 | 0 | -5.217671 | 2.464082  | 0.787929  |
| 22 | 1 | 0 | -4.172784 | 2.498148  | -0.64156  |
| 23 | 1 | 0 | -3.600961 | 3.151008  | 0.905398  |
| 24 | 6 | 0 | -2.044515 | 1.620223  | 2.795264  |
| 25 | 1 | 0 | -2.634414 | 1.755481  | 3.711191  |
| 26 | 1 | 0 | -1.916733 | 2.601986  | 2.336208  |
| 27 | 1 | 0 | -1.057409 | 1.253108  | 3.0881    |
| 28 | 7 | 0 | -0.611219 | -1.693685 | -0.636179 |
| 29 | 6 | 0 | 0.689249  | -1.31943  | -0.811794 |
| 30 | 6 | 0 | 1.667444  | -2.267583 | -1.131248 |
| 31 | 1 | 0 | 2.705718  | -1.983379 | -1.220872 |
| 32 | 6 | 0 | 1.300995  | -3.596292 | -1.325615 |
| 33 | 1 | 0 | 2.053914  | -4.337132 | -1.574498 |
| 34 | 6 | 0 | -0.040255 | -3.952117 | -1.207029 |
| 35 | 1 | 0 | -0.376578 | -4.969358 | -1.373861 |
| 36 | 6 | 0 | -0.961365 | -2.969496 | -0.859741 |
| 37 | 1 | 0 | -2.013645 | -3.196909 | -0.759055 |
| 38 | 7 | 0 | -0.197035 | 0.841131  | -0.302771 |
| 39 | 6 | 0 | 0.870017  | 0.117767  | -0.654939 |
| 40 | 7 | 0 | 1.957433  | 0.918593  | -0.891896 |
| 41 | 6 | 0 | 1.545142  | 2.229341  | -0.674342 |
| 42 | 6 | 0 | 2.233923  | 3.443719  | -0.772166 |
| 43 | 1 | 0 | 3.288436  | 3.494279  | -1.021504 |
| 44 | 6 | 0 | 1.501796  | 4.599905  | -0.536609 |
| 45 | 1 | 0 | 1.99724   | 5.5631    | -0.605082 |
| 46 | 6 | 0 | 0.125275  | 4.552786  | -0.224339 |
| 47 | 1 | 0 | -0.413288 | 5.483031  | -0.074056 |

|                            |    |   |                |           |           |
|----------------------------|----|---|----------------|-----------|-----------|
| 48                         | 6  | 0 | -0.552361      | 3.347579  | -0.118078 |
| 49                         | 1  | 0 | -1.613813      | 3.3118    | 0.086411  |
| 50                         | 6  | 0 | 3.311856       | 0.562767  | -1.325886 |
| 51                         | 1  | 0 | 3.703465       | 1.433569  | -1.858111 |
| 52                         | 1  | 0 | 3.244628       | -0.237741 | -2.066303 |
| 53                         | 6  | 0 | 4.228732       | 0.194352  | -0.149315 |
| 54                         | 1  | 0 | 3.843903       | -0.692139 | 0.366804  |
| 55                         | 1  | 0 | 4.23113        | 1.011337  | 0.578945  |
| 56                         | 6  | 0 | 5.661496       | -0.062729 | -0.622077 |
| 57                         | 1  | 0 | 6.103586       | 0.824089  | -1.089509 |
| 58                         | 1  | 0 | 5.7459         | -0.898634 | -1.322354 |
| 59                         | 16 | 0 | 6.77348        | -0.438592 | 0.757212  |
| 60                         | 8  | 0 | 6.534621       | 0.529647  | 1.818693  |
| 61                         | 8  | 0 | 6.108241       | -1.887736 | 1.189355  |
| 62                         | 8  | 0 | 8.114846       | -0.705511 | 0.251202  |
| 63                         | 1  | 0 | 6.847255       | -2.469366 | 1.456917  |
| 64                         | 77 | 0 | -2.008232      | -0.181906 | -0.047684 |
| Rotational constants (GHz) |    |   | 0.1716053      | 0.0588426 | 0.0516041 |
| E (a.u.)                   |    |   | -2323.58027462 |           |           |

**Table S3** Atomic coordinates of the optimized structure of **3**.

| Center Number | Atomic Number | Atomic Type | Coordinates (Angstroms) |           |           |
|---------------|---------------|-------------|-------------------------|-----------|-----------|
|               |               |             | X                       | Y         | Z         |
| 1             | 17            | 0           | -8.091166               | -1.278954 | -2.090816 |
| 2             | 6             | 0           | -10.05705               | -0.64948  | 1.32461   |
| 3             | 6             | 0           | -5.976971               | 1.711341  | -1.215734 |
| 4             | 6             | 0           | -9.281679               | 0.41424   | 1.959323  |
| 5             | 6             | 0           | -10.492059              | -0.182744 | 0.046464  |
| 6             | 6             | 0           | -9.97745                | 1.163174  | -0.14907  |
| 7             | 6             | 0           | -9.272918               | 1.538895  | 1.062808  |
| 8             | 6             | 0           | -8.755956               | 0.391802  | 3.363886  |
| 9             | 1             | 0           | -8.419298               | -0.607231 | 3.655617  |

|    |   |   |            |           |           |
|----|---|---|------------|-----------|-----------|
| 10 | 1 | 0 | -9.541946  | 0.692651  | 4.068856  |
| 11 | 1 | 0 | -7.91573   | 1.07926   | 3.490723  |
| 12 | 6 | 0 | -10.478787 | -1.931826 | 1.97786   |
| 13 | 1 | 0 | -11.462266 | -1.796796 | 2.446285  |
| 14 | 1 | 0 | -9.789097  | -2.236817 | 2.769219  |
| 15 | 1 | 0 | -10.57274  | -2.749372 | 1.257424  |
| 16 | 6 | 0 | -11.363954 | -0.910532 | -0.927407 |
| 17 | 1 | 0 | -11.425006 | -1.977387 | -0.703527 |
| 18 | 1 | 0 | -10.990335 | -0.803463 | -1.948463 |
| 19 | 1 | 0 | -12.379831 | -0.496095 | -0.88404  |
| 20 | 6 | 0 | -10.377942 | 2.05475   | -1.28863  |
| 21 | 1 | 0 | -11.448908 | 2.285205  | -1.222084 |
| 22 | 1 | 0 | -10.19876  | 1.577159  | -2.256011 |
| 23 | 1 | 0 | -9.845371  | 3.008499  | -1.268433 |
| 24 | 6 | 0 | -8.692342  | 2.885886  | 1.369398  |
| 25 | 1 | 0 | -9.444088  | 3.496944  | 1.885771  |
| 26 | 1 | 0 | -8.394539  | 3.422112  | 0.466522  |
| 27 | 1 | 0 | -7.819112  | 2.811513  | 2.022428  |
| 28 | 7 | 0 | -6.811414  | -1.654126 | 0.699149  |
| 29 | 6 | 0 | -5.491836  | -1.363828 | 0.510529  |
| 30 | 6 | 0 | -4.495773  | -2.234412 | 0.966473  |
| 31 | 1 | 0 | -3.451164  | -1.972513 | 0.874475  |
| 32 | 6 | 0 | -4.855893  | -3.441487 | 1.558878  |
| 33 | 1 | 0 | -4.09108   | -4.124494 | 1.914396  |
| 34 | 6 | 0 | -6.206723  | -3.759695 | 1.676989  |
| 35 | 1 | 0 | -6.535094  | -4.699667 | 2.106391  |
| 36 | 6 | 0 | -7.149512  | -2.835865 | 1.237695  |
| 37 | 1 | 0 | -8.208836  | -3.039778 | 1.309223  |
| 38 | 7 | 0 | -6.3847    | 0.633946  | -0.452062 |
| 39 | 6 | 0 | -5.302337  | -0.107245 | -0.200617 |
| 40 | 7 | 0 | -4.175459  | 0.447267  | -0.753454 |
| 41 | 6 | 0 | -4.580744  | 1.613962  | -1.394538 |
| 42 | 6 | 0 | -3.859851  | 2.559866  | -2.131698 |
| 43 | 1 | 0 | -2.785346  | 2.492108  | -2.265162 |
| 44 | 6 | 0 | -4.585696  | 3.599287  | -2.699504 |
| 45 | 1 | 0 | -4.065893  | 4.352925  | -3.282509 |
| 46 | 6 | 0 | -5.986657  | 3.689872  | -2.549089 |
| 47 | 1 | 0 | -6.517325  | 4.505009  | -3.030556 |
| 48 | 6 | 0 | -6.697817  | 2.753051  | -1.813846 |
| 49 | 1 | 0 | -7.775046  | 2.799872  | -1.731407 |
| 50 | 6 | 0 | -2.814774  | -0.092443 | -0.864529 |
| 51 | 1 | 0 | -2.438631  | 0.228979  | -1.84043  |
| 52 | 1 | 0 | -2.877169  | -1.182023 | -0.910614 |
| 53 | 6 | 0 | -1.865878  | 0.378314  | 0.248098  |
| 54 | 1 | 0 | -2.246305  | 0.052613  | 1.225573  |
| 55 | 1 | 0 | -1.863404  | 1.475512  | 0.269813  |

|     |   |   |           |           |           |
|-----|---|---|-----------|-----------|-----------|
| 56  | 6 | 0 | -0.435162 | -0.145873 | 0.040807  |
| 57  | 1 | 0 | -0.443792 | -1.245952 | 0.039362  |
| 58  | 1 | 0 | -0.086761 | 0.159688  | -0.955785 |
| 59  | 6 | 0 | 0.540388  | 0.349553  | 1.122611  |
| 60  | 6 | 0 | 1.964646  | -0.229693 | 1.026114  |
| 61  | 1 | 0 | 0.585231  | 1.448064  | 1.096676  |
| 62  | 1 | 0 | 0.137765  | 0.08772   | 2.109256  |
| 63  | 6 | 0 | 2.74581   | 0.256873  | -0.204796 |
| 64  | 1 | 0 | 2.522262  | 0.03774   | 1.932688  |
| 65  | 1 | 0 | 1.922362  | -1.326275 | 1.007835  |
| 66  | 7 | 0 | 4.092551  | -0.319371 | -0.305495 |
| 67  | 1 | 0 | 2.230867  | -0.020966 | -1.127874 |
| 68  | 1 | 0 | 2.833133  | 1.34568   | -0.223655 |
| 69  | 6 | 0 | 5.29933   | 0.173972  | 0.122316  |
| 70  | 6 | 0 | 4.369599  | -1.474308 | -1.029336 |
| 71  | 6 | 0 | 5.623327  | 1.388921  | 0.857285  |
| 72  | 7 | 0 | 6.312957  | -0.593397 | -0.287334 |
| 73  | 6 | 0 | 5.772316  | -1.626254 | -1.029583 |
| 74  | 6 | 0 | 3.526697  | -2.369544 | -1.696975 |
| 75  | 7 | 0 | 6.96699   | 1.620855  | 0.901389  |
| 76  | 6 | 0 | 4.724643  | 2.269816  | 1.469306  |
| 77  | 6 | 0 | 6.37203   | -2.67126  | -1.743977 |
| 78  | 1 | 0 | 2.447224  | -2.260903 | -1.689691 |
| 79  | 6 | 0 | 4.135394  | -3.413911 | -2.381519 |
| 80  | 6 | 0 | 7.415239  | 2.754738  | 1.462502  |
| 81  | 1 | 0 | 3.665862  | 2.053761  | 1.486353  |
| 82  | 6 | 0 | 5.201802  | 3.427057  | 2.077957  |
| 83  | 6 | 0 | 5.539515  | -3.557748 | -2.411156 |
| 84  | 1 | 0 | 7.448343  | -2.757773 | -1.796947 |
| 85  | 1 | 0 | 3.518632  | -4.130032 | -2.915286 |
| 86  | 6 | 0 | 6.570211  | 3.68559   | 2.057738  |
| 87  | 1 | 0 | 8.483849  | 2.913351  | 1.424138  |
| 88  | 1 | 0 | 4.512581  | 4.116828  | 2.55437   |
| 89  | 1 | 0 | 5.974323  | -4.374627 | -2.978205 |
| 90  | 1 | 0 | 6.986627  | 4.584756  | 2.498043  |
| 91  | 1 | 0 | 9.537469  | -3.084799 | -1.589578 |
| 92  | 6 | 0 | 10.07206  | -2.136955 | -1.687313 |
| 93  | 6 | 0 | 9.879753  | -1.2575   | -0.485495 |
| 94  | 1 | 0 | 11.135588 | -2.381044 | -1.803675 |
| 95  | 1 | 0 | 9.741322  | -1.642703 | -2.605318 |
| 96  | 6 | 0 | 10.469826 | 0.06225   | -0.346064 |
| 97  | 6 | 0 | 9.348587  | -1.635074 | 0.812427  |
| 98  | 6 | 0 | 10.248904 | 0.51706   | 0.991063  |
| 99  | 6 | 0 | 11.220251 | 0.781104  | -1.422119 |
| 100 | 6 | 0 | 9.540943  | -0.534889 | 1.717776  |
| 101 | 6 | 0 | 8.766127  | -2.967158 | 1.175304  |

|                            |    |   |                |           |           |
|----------------------------|----|---|----------------|-----------|-----------|
| 102                        | 6  | 0 | 10.817973      | 1.768117  | 1.592216  |
| 103                        | 1  | 0 | 11.269391      | 1.85626   | -1.238499 |
| 104                        | 1  | 0 | 10.757561      | 0.630042  | -2.399643 |
| 105                        | 1  | 0 | 12.24806       | 0.395834  | -1.462273 |
| 106                        | 6  | 0 | 9.234113       | -0.525373 | 3.185536  |
| 107                        | 1  | 0 | 9.566899       | -3.632913 | 1.522797  |
| 108                        | 1  | 0 | 8.280369       | -3.449801 | 0.325003  |
| 109                        | 1  | 0 | 8.032028       | -2.882565 | 1.98059   |
| 110                        | 1  | 0 | 11.856442      | 1.587936  | 1.89879   |
| 111                        | 1  | 0 | 10.273056      | 2.081659  | 2.486796  |
| 112                        | 1  | 0 | 10.829697      | 2.596448  | 0.878251  |
| 113                        | 1  | 0 | 8.973442       | 0.476156  | 3.539423  |
| 114                        | 1  | 0 | 10.110229      | -0.857809 | 3.757521  |
| 115                        | 1  | 0 | 8.405258       | -1.194697 | 3.4294    |
| 116                        | 17 | 0 | 7.846955       | 1.348765  | -2.053522 |
| 117                        | 77 | 0 | -8.249052      | -0.186713 | 0.080331  |
| 118                        | 77 | 0 | 8.259828       | 0.152126  | 0.026062  |
| Rotational constants (GHz) |    |   | 0.0978516      | 0.0070092 | 0.0069022 |
| E (a.u.)                   |    |   | -3398.35628365 |           |           |

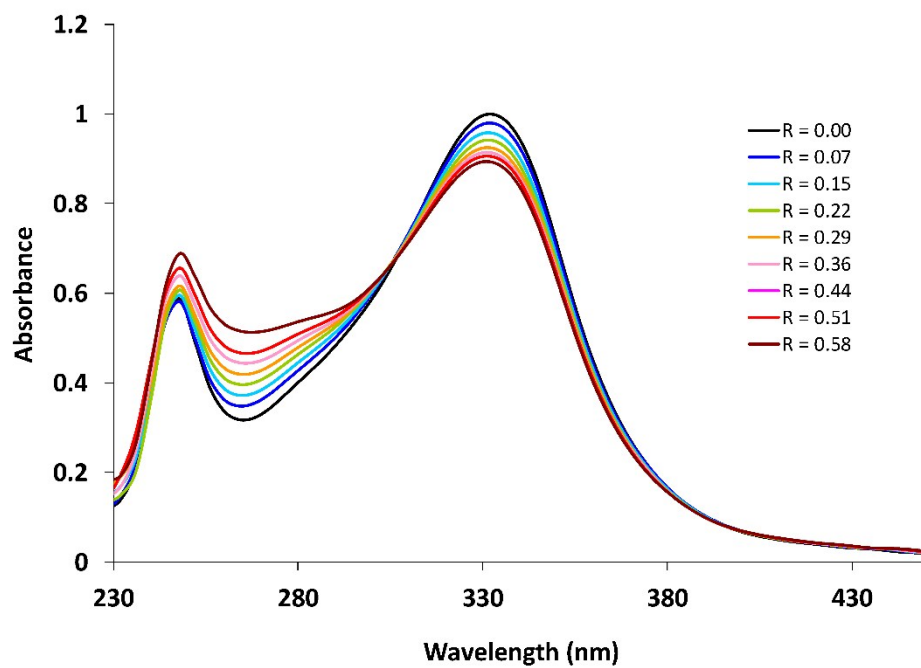

a)



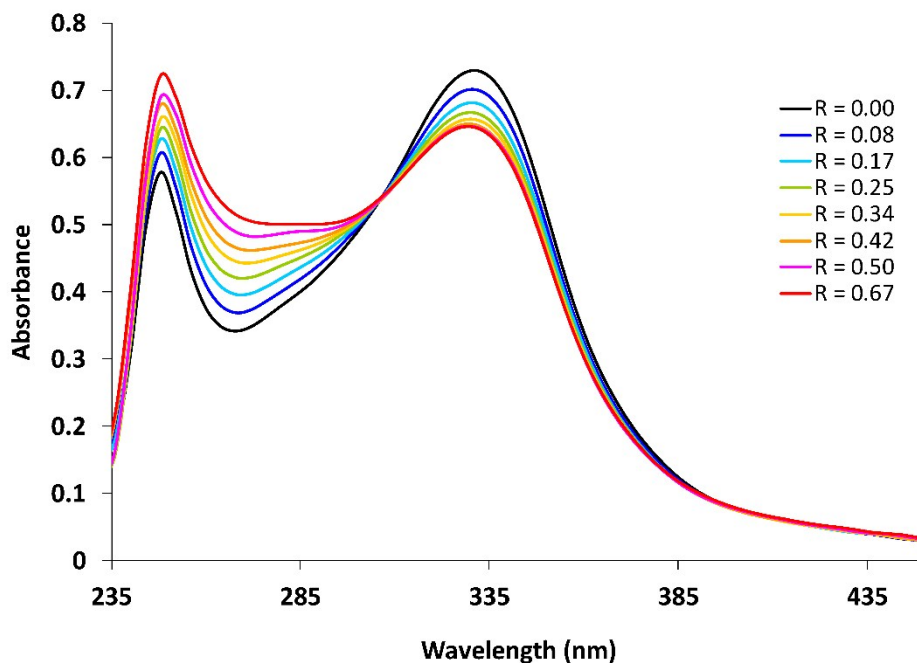

b)

Figure S6 Absorption spectra of complex a) **1** and b) **2** in Tris-buffer (in 20% (v/v) DMSO/tris-buffer (NaCl 50 mM, Tris-HCl 5 mM, pH = 7.4)), in absence ( $R = 0.0$ ) and presence ( $R > 0.0$ ) of increasing amounts of calf-thymus DNA ( $R = [\text{DNA}]/[\text{complex}]$ ,  $[\text{complex}] = 3.22 \times 10^{-5} \text{ M}$  (**1**) and  $2.80 \times 10^{-5} \text{ M}$  (**2**)).

| Table S4†: Computed excitation energies (eV), electronic transition configurations and oscillator strengths ( $f$ ) of the studied complexes (selected). |                 |        |                                          |
|----------------------------------------------------------------------------------------------------------------------------------------------------------|-----------------|--------|------------------------------------------|
| Energy (cm <sup>-1</sup> )                                                                                                                               | Wavelength (nm) | $f$    | Major contributions (> 20 %)             |
| <b>• 1</b>                                                                                                                                               |                 |        |                                          |
| 30153                                                                                                                                                    | 331             | 0.0512 | HOMO-1→LUMO+3 (22%), HOMO→LUMO (59%)     |
| 32233                                                                                                                                                    | 310             | 0.1064 | HOMO-1→LUMO (53%)                        |
| 34784                                                                                                                                                    | 287             | 0.4916 | HOMO-2→LUMO (80%)                        |
| 37681                                                                                                                                                    | 265             | 0.0555 | HOMO-3→LUMO (81%)                        |
| 47453                                                                                                                                                    | 210             | 0.1526 | HOMO-2→LUMO+2 (22%), HOMO-2→LUMO+3 (26%) |
| 48997                                                                                                                                                    | 204             | 0.2137 | HOMO-8→LUMO (34%)                        |
| <b>• 2</b>                                                                                                                                               |                 |        |                                          |
| 30093                                                                                                                                                    | 332             | 0.0553 | HOMO-1→LUMO+3 (22%), HOMO→LUMO (56%)     |
| 31693                                                                                                                                                    | 315             | 0.0479 | HOMO-1→LUMO (49%)                        |
| 32235                                                                                                                                                    | 310             | 0.0795 | HOMO-1→LUMO (29%)                        |
| 34797                                                                                                                                                    | 287             | 0.5136 | HOMO-2→LUMO (85%)                        |
| 37703                                                                                                                                                    | 265             | 0.0638 | HOMO-3→LUMO (79%)                        |
| 47506                                                                                                                                                    | 210             | 0.2002 | HOMO-2→L+3 (31%)                         |
| 49067                                                                                                                                                    | 203             | 0.1724 | HOMO-8→LUMO (25%)                        |

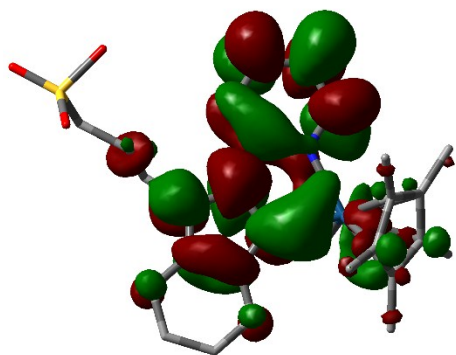

LUMO+3

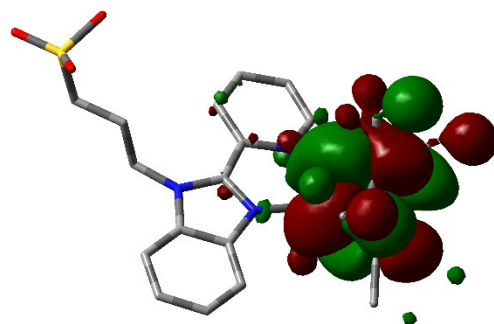

LUMO+2

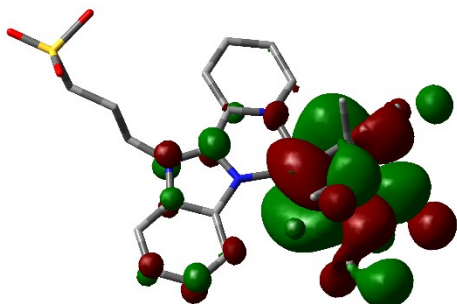

LUMO+1

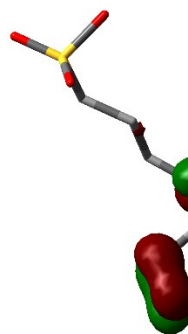

LUMO

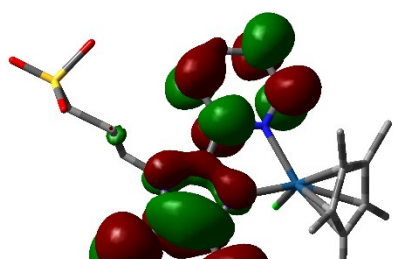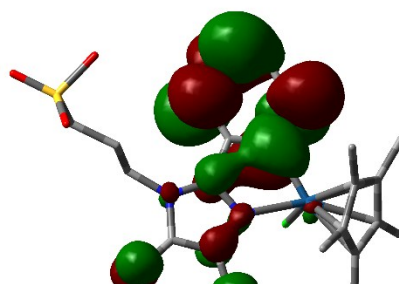

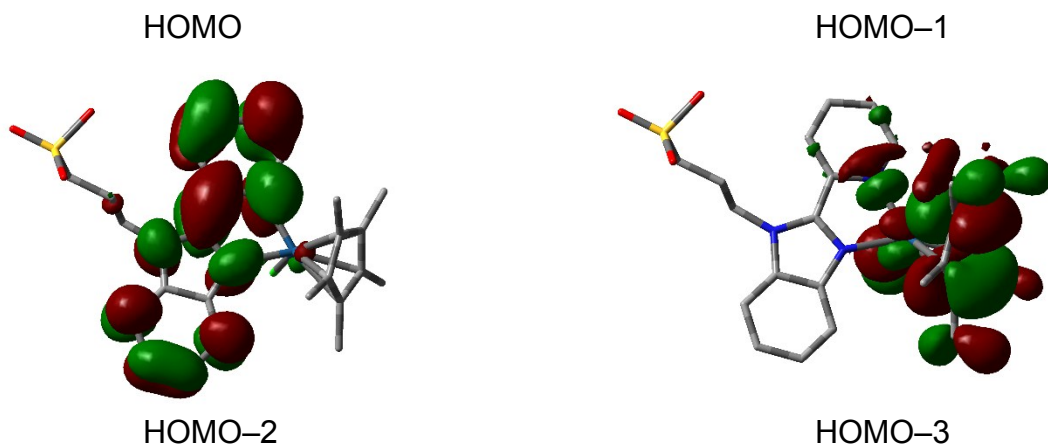

Figure S7 Selected Frontiers molecular orbitals of **2** calculated at B3LYP/LANL2DZ level of theory.

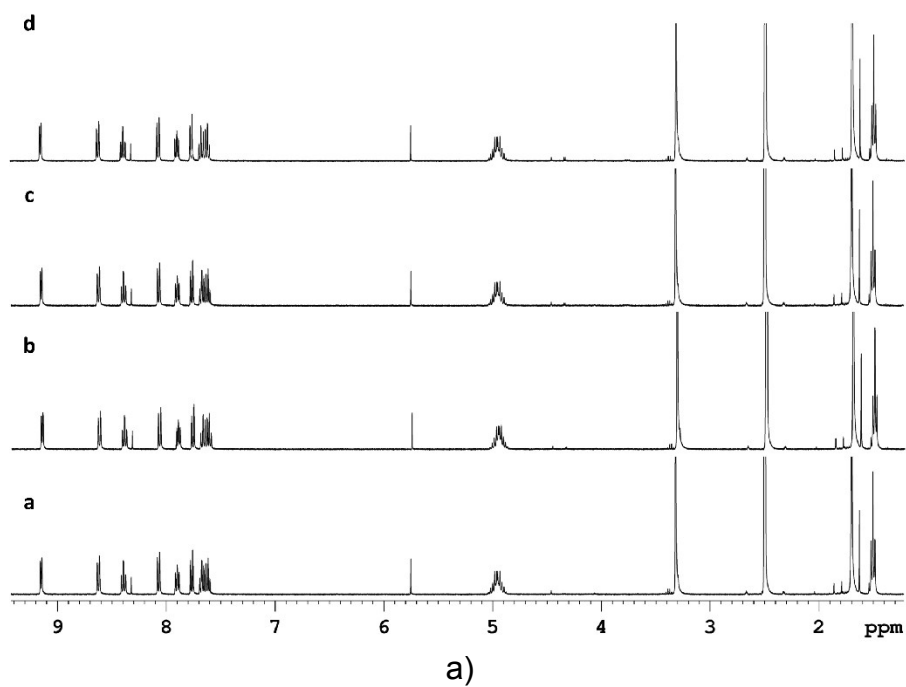

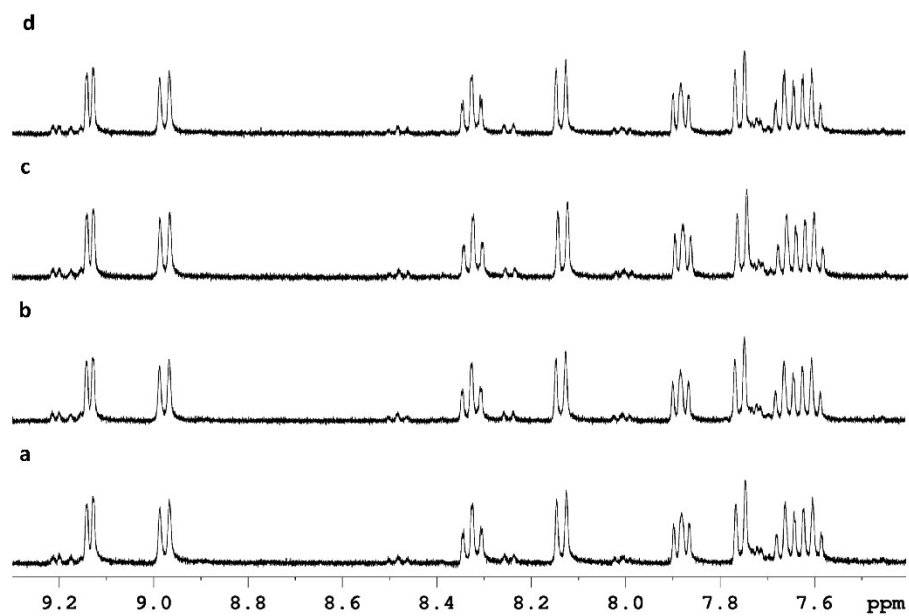

b)

Figure S8 Stability of a) **1** and b) **2** (aromatic region) in [D<sub>6</sub>] DMSO followed by <sup>1</sup>H NMR at different time interval [a (10 min), b (1 h), c (6 h) and d (24 h)].

**Complex 1 + Imidazole**

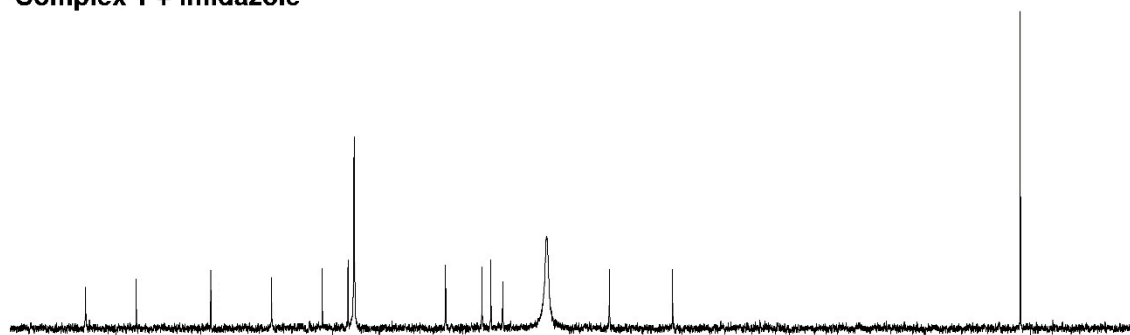

**Complex 1**

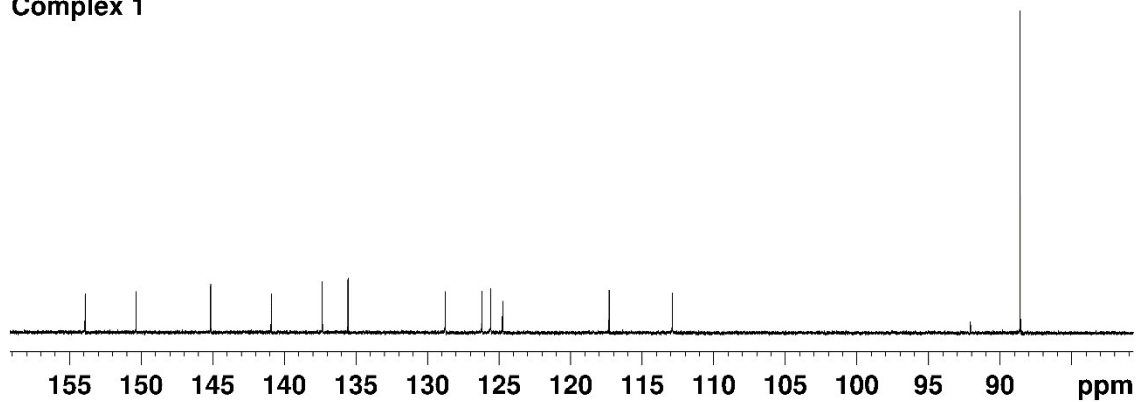

Figure S9  $^{13}\text{C}$  NMR spectra of complex 1 ( $[\text{D}_6]$  DMSO) in presence and absence of imidazole.

## Biological activity testing

### Evaluation of antimicrobial properties

The antimicrobial activities of the synthesized ligands and complexes were evaluated against cultures of *Staphylococcus aureus* ATCC 43300, *Escherichia coli* ATCC 25922, *Klebsiella pneumoniae* ATCC 700603, *Acinetobacter baumannii* ATCC 19606, *Pseudomonas aeruginosa* ATCC 27853, as well as two fungi, *Candida albicans* ATCC 90028 and *Cryptococcus neoformans var. grubii* H99; ATCC 208821. The samples were prepared in DMSO to a final testing concentration of 32 µg/mL and serially diluted 1:2 fold for 8 times. Each concentration was prepared in 384-well plates, non-binding surface plate (NBS; Corning 3640) for each bacterial/fungal strain, all in duplicate (n=2), and keeping the final DMSO concentration to a maximum of 0.5%. All bacteria were cultured in Cation-adjusted Mueller Hinton broth at 37 °C overnight. A sample of each culture was then diluted 40-fold in fresh broth and incubated at 37 °C for 1.5-3 h. The resultant mid-log phase cultures were diluted (CFU/mL, measured the absorbance at 600 nm), then added to each well of the compound containing plates, giving a cell density of  $5 \times 10^5$  CFU/mL and a total volume of 50 µL. All the plates were covered and incubated at 37 °C for 18 h without shaking. The inhibition of the bacterial growth was determined by OD<sub>600</sub> using a Tecan M1000 Pro monochromator plate reader. The percentage of growth inhibition was calculated for each well, using the negative control (media only) and positive control (bacteria without inhibitors) on the same plate as references. The MIC was determined as the lowest concentration at which the growth was fully inhibited, defined by an inhibition  $\geq 80\%$ . In addition, the maximal percentage of growth inhibition is reported as D<sub>Max</sub>, indicating any compounds with partial activity plates.

Fungi strains were cultured for 3 days on Yeast Extract-peptone Dextrose agar at 30 °C. A yeast suspension of  $1 \times 10^6$  to  $5 \times 10^6$  CFU/mL (determined by OD<sub>600</sub>) was prepared from five colonies. The suspension was subsequently diluted and added to each well of the sample-containing plates giving a cell density of fungi suspension of  $2.5 \times 10^3$  CFU/mL and total volume of 50 µL. All plates were covered and incubated at 35 °C for 36 h without shaking. The growth inhibition of *Candida albicans* was measured at 630 nm, while that of *Cryptococcus neoformans* was determined by measuring the difference in

absorbance at 600 and 570 nm, after the addition of resazurin (0.001%, final concentration) and incubation at 35 °C for 2 h. The absorbance was measured using a Biotek Multiflo Synergy HTX plate reader and controls. The MIC was determined as the lowest concentration at which the growth was fully inhibited, defined by an inhibition = 80% for *Candida albicans* and an inhibition = 70% for *Cryptococcus neoformans*. Due to a higher variance in the growth and inhibition, a lower threshold was applied to the data for *Cryptococcus neoformans*. In addition, the maximal percentage of growth inhibition is reported as  $D_{Max}$ , indicating any compounds with marginal activity.

### **Cytotoxicity Assay**

Human embryonic kidney HEK293 cells were counted manually in a Neubauer haemocytometer and then plated in the 384-well plates containing the compounds to give a density of 5000 cells/well in a final volume of 50  $\mu$ L. Dulbecco's Modified Eagle Medium (DMEM) supplemented with 10% FBS was used as growth media and the cells were incubated together with the compounds for 20 h at 37 °C in 5% CO<sub>2</sub>. Cytotoxicity (or cell viability) was measured by Fluorescence (excitation 560/10, emission 590/10 nm) ( $F_{560/590}$ ), after addition of 5  $\mu$ L of 25  $\mu$ g/mL resazurin (2.3  $\mu$ g/mL final concentration) and after incubation for further 3 h at 37 °C in 5% CO<sub>2</sub>. The intensity was measured using Tecan M1000 Pro monochromator plate reader, using automatic gain calculation. CC<sub>50</sub> (the concentration at 50% cytotoxicity) was calculated by curve fitting the inhibition values vs. logC using a sigmoidal dose-response function, with variable fitting values for bottom, top and slope. The curve fitting was implemented using Pipeline Pilot's dose-response component, resulting in similar values to curve fitting tools such as GraphPad's Prism and IDBS's XIFit.
